# Supplementary material for: CHI3L1, NTRK2, 1p/19q and IDH Status Predicts Prognosis in Glioma
Source: PubMed Central journal article supplement (PMC6521129; doi:10.3390/cancers11040544), 2019-04-15

## Supplementary Materials: *CHI3L1*, *NTRK2*, *1p/19q* and *IDH* Status Predicts Prognosis in Glioma

Elise Deluche, Barbara Bessette, Stephanie Durand, François Caire, Valérie Rigau, Sandrine Robert, Alain Chaunavel, Lionel Forestier, François Labrousse, Marie-Odile Jauberteau, Karine Durand and Fabrice Lalloué

**Table S1. Clinical and histological characteristics of the French cohort according to molecular group.**

| Characteristics                          | Total   | Group A | Group B | <i>p</i> -Value |
|------------------------------------------|---------|---------|---------|-----------------|
| <i>N</i>                                 | 64      | 31      | 33      |                 |
| Age, years                               |         |         |         |                 |
| Median                                   | 47.5    | 55.0    | 40.0    | 0.0024          |
| Range                                    | 22–81   | 26–81   | 22–80   |                 |
| Sex                                      |         |         |         |                 |
| Female/male                              | 26/38   | 12/19   | 14/19   | 0.7             |
| Surgical approach, <i>n</i> (%)          |         |         |         |                 |
| Complete resection                       | 29 (45) | 11 (35) | 18(54)  | 0.12            |
| Subtotal resection                       | 35 (55) | 20 (65) | 15(46)  |                 |
| Histology, <i>n</i> (%)                  |         |         |         |                 |
| Astrocytoma (II/III/IV)                  | 7/17/21 | 4/4/17  | 8/13/4  | 0.0002          |
| Oligodendroglioma (II/III)               | 7/8     | 2/6     | 5/2     |                 |
| <i>IDH</i> mutant/ <i>IDH</i> wild-type  | 36/28   | 14/17   | 22/11   | 0.04            |
| 1p19q codeletion: yes/no                 | 14/50   | 6/25    | 8/25    | 0.6             |
| Localization, <i>n</i> (%)               |         |         |         |                 |
| Frontal                                  | 30 (46) | 15 (48) | 15 (45) |                 |
| Temporal                                 | 19 (30) | 7 (23)  | 12 (37) | 0.2             |
| Parietal                                 | 11 (18) | 8 (25)  | 3 (9)   |                 |
| Occipital                                | 4 (6)   | 1 (4)   | 3 (9)   |                 |
| Radiotherapy in first line, <i>n</i> (%) | 44 (69) | 25 (80) | 19 (63) | 0.04            |
| Chemotherapy in first line, <i>n</i> (%) | 35 (54) | 20 (64) | 15 (51) | 0.1             |

*p*-value was calculated for all patients in the histology and localization groups by chi-square test.

**Table S2. Clinical and histological characteristics of the TCGA cohort.**

| Characteristics                         | Total       | Group A   | Group B  | <i>p</i> -Value |
|-----------------------------------------|-------------|-----------|----------|-----------------|
| Number                                  | 671         | 283       | 388      |                 |
| Age, years                              |             |           |          |                 |
| Median                                  | 46.0        | 58.0      | 38.0     | <0.001          |
| Range                                   | 18–89       | 21–89     | 18–87    |                 |
| Histology                               |             |           |          |                 |
| Astrocytomas (II/III/IV)                | 144/186/157 | 22/90/154 | 122/96/3 | <0.001          |
| Oligodendrogliomas (II/III)             | 105/79      | 7/10      | 98/69    |                 |
| <i>IDH</i> mutant/ <i>IDH</i> wild-type | 421/250     | 53/230    | 368/20   | <0.001          |
| 1p19q codeletion: yes/no                | 181/491     | 18/265    | 163/225  | <0.001          |

Table S3. Univariate and Multivariate Cox Proportional-Hazards Models for gliomas in TCGA cohort.

| Characteristics         | No. of Patients | Overall survival     |          |                   |          |
|-------------------------|-----------------|----------------------|----------|-------------------|----------|
|                         |                 | Univariate           |          | Multivariate      |          |
|                         |                 | HR (95% CI)          | <i>p</i> | HR (95% CI)       | <i>p</i> |
| <b>Age at diagnosis</b> | 671             | 1.067 (1.05–1.07)    | <0.0001  | 1.033 (1.02–1.04) | <0.0001  |
| <b>Histologic type</b>  |                 |                      |          |                   |          |
| Astrocytoma             | 487             | Reference            | <0.0001  | Reference         |          |
| Oligodendroglioma       | 184             | 0.075 (0.0001–0.14)  |          | 0.775 (0.37–1.59) | 0.489    |
| <b>Grade</b>            |                 |                      |          |                   |          |
| II                      | 249             | Reference            |          | Reference         |          |
| III                     | 265             | 3.185 (2.16–4.69)    | <0.0001  | 1.93 (1.28–2.91)  | 0.002    |
| IV                      | 157             | 19.313 (13.01–28.67) | <0.0001  | 3.65 (2.17–6.14)  | <0.0001  |
| <b>Molecular group</b>  |                 |                      |          |                   |          |
| Poor prognosis group    | 235             | 29.129 (12.80–66.26) | <0.0001  | 7.55 (2.69–21.20) | 0.0001   |
| Intermediate group      | 355             | 3.347 (1.455–7.702)  | 0.004    | 2.69 (1.07–6.77)  | 0.035    |
| Good prognosis group    | 81              | Reference            |          | Reference         |          |

**Table S4.** Custom-made human-specific TaqMan® micro-fluidic cards containing panels of 96 gene expression assays.

| Function                | Gene Name                     | Gene Symbol | GenBank No.        | Human Assay ID | Function              | Gene Name              | Gene Symbol                 | GenBank No.    | Human Assay ID |
|-------------------------|-------------------------------|-------------|--------------------|----------------|-----------------------|------------------------|-----------------------------|----------------|----------------|
| Receptors               | EGFRa                         | EGFR        | NM_005228          | Hs01076078_m1  | Neurotrophin pathways | NTRK1                  | NTRK1                       | NM_001007792.1 | Hs01021011_m1  |
|                         | EGFRb                         | EGFRb       | NM_201282          | A189KGC        |                       | NTRK2                  | NTRK2                       | NM_001007097.1 | Hs00178811_m1  |
|                         | EGFRc                         | EGFRc       | NM_201283          | A1AAZL5        |                       | NTRK2                  | NTRK2 T1<br>(NTRK2 bis)     | NM_001007097.1 | Hs01093110_m1  |
|                         | EGFRD                         | EGFRD       | NM_201284          | A1BJXSD        |                       | NTRK2                  | NTRK2 FL<br>(NTRK2 variant) | NM_006180.3    | Hs01093096_m1  |
|                         | EGFRvIII                      | EGFRvIII    | custom-designed    | A1CSVYL        |                       | NTRK3                  | NTRK3                       | NM_001007156.2 | Hs00176797_m1  |
|                         | ERB-2                         | ERRB2       | NM_004448          | Hs01001580_m1  |                       | P75                    | P75                         | NM_002507.3    | Hs00609977_m1  |
|                         | ERB-3                         | ERRB3       | NM_001982          | Hs00951464_m1  |                       | SORTILIN 1             | SORT1                       | NM_001205228.1 | Hs00361760_m1  |
|                         | ERB-3                         | sERRB3      | NM_001005915.1     | Hs00176538_m1  |                       | NEUROTENSIN            | NTS                         | NM_006183.4    | Hs00175048_m1  |
|                         | ERB-4                         | ERB4        | NM_005235          | Hs00955525_m1  |                       | NEUROTENSIN RECEPTOR 1 | NTSR1                       | NM_002531.2    | Hs00901551_m1  |
|                         | MET                           | MET         | NM_000245          | Hs01565584_m1  |                       | NEUROTENSIN RECEPTOR 2 | NTSR2                       | NM_012344.3    | Hs00892563_m1  |
| Ligands                 | EGF                           | EGF         | NM_001963          | Hs01099999_m1  | Hypoxia               | HIF-a                  | HIF-a                       | NM_001243084.1 | Hs00153153_m1  |
|                         | TGF-a                         | TGF-a       | NM_003236          | Hs00608187_m1  |                       | HIF-b                  | HIF-b                       | NM_001197325.1 | Hs01121918_m1  |
|                         | AMPHIREGULIN                  | AREG        | NM_001657          | Hs00950669_m1  |                       | VEGF-A                 | VEGF-A                      | NM_001025366.2 | Hs00900055_m1  |
|                         | EPIREGULIN                    | EREG        | NM_001432          | Hs00914313_m1  |                       | VEGF-2                 | KDR                         | NM_001243733.1 | Hs00173634_m1  |
|                         | BETACELLULIN                  | BTC         | NM_001729          | Hs01101204_m1  |                       | VEGF-3                 | FLT4                        | NM_005429.2    | Hs00153458_m1  |
|                         | HEPARIN-BINDING GROWTH FACTOR | HB-EGF      | NM_001945          | Hs00181813_m1  |                       | VEGF-D                 | VEGF-D                      | NM_004469.4    | Hs01128657_m1  |
|                         | NEUREGULIN 1                  | NRG1-1      | NM_001160001.1.... | Hs00247620_m1  |                       | VEGFR-I                | VEGFR-I                     | NM_001159920.1 | Hs01052961_m1  |
|                         |                               | NRG1-2      | NM_001160002.1     | Hs01108479_m1  |                       | VEGFR-II               | VEGFR-II                    | NM_002253.2    | Hs00911700_m1  |
|                         |                               | NRG1-3      | NM_013959.3        | Hs01103792_m1  |                       | VEGFR-III              | VEGFR-III                   | NM_002020.4    | Hs01047677_m1  |
|                         | NEUREGULIN 2                  | NRG2        | NM_001184935.1     | Hs00171706_m1  |                       | LC3                    | LC3                         | NM_032514.3    | Hs01076567_g1  |
|                         | NEUREGULIN 3                  | NRG3        | NM_001165972.1     | Hs01377907_m1  | BNIP3                 | BNIP3                  | NM_004052.2                 | Hs00969291_m1  |                |
|                         | NEUREGULIN 4                  | NGR4        | NM_138573.3        | Hs00945535_m1  | BECLIN                | BECLIN                 | NM_003766.3                 | Hs00186838_m1  |                |
|                         | TOMOREGULIN                   | TMEFF- 1    | NM_003692.4        | Hs00902905_m1  | PINK1                 | PINK1                  | NM_032409.2                 | Hs00260868_m1  |                |
|                         | TOMOREGULIN (ERB4)            | TMEFF- 2    | NM_016192.2        | Hs01086906_m1  | PARKIN                | PARK2                  | NM_004562.2                 | Hs01038325_m1  |                |
|                         | KRAS                          | KRAS        | NM_033360.2        | Hs00364284_g1  | NIX                   | NIX                    | NM_004331.2                 | Hs01087963-m1  |                |
|                         | NRAS                          | NRAS        | NM_002524.4        | Hs00180035_m1  | ATG5                  | ATG5                   | NM_004849.2                 | Hs00169468_m1  |                |
| Intracellular signaling | BRAF                          | BRAF        | NM_004333.4        | Hs00269944_m1  | P62                   | P62                    | NM_001142298.1              | Hs01061917_g1  |                |
|                         | PIK3CA                        | PIK3CA      | NM_006218.2        | Hs00907957_m1  | Glycosylation         | CHI3L1                 | CHI3L1                      | NM_001276.2    | Hs00609691_m1  |

|                       |                     |         |                               |               |                           |                      |                 |                |               |
|-----------------------|---------------------|---------|-------------------------------|---------------|---------------------------|----------------------|-----------------|----------------|---------------|
|                       | AKT1                | AKT1    | NM_004562.2                   | Hs00178289_m1 |                           | KLRC3                | KLRC3           | NM_002261.2    | Hs00749702_s1 |
|                       | AKT2                | AKT2    | NM_013987.2                   | Hs01086102_m1 |                           | ST3GAL5              | ST3GAL5         | NM_001042437.1 | Hs00187405_m1 |
|                       | AKT3                | AKT3    | NM_013988.2                   | Hs00987350_m1 |                           | ATHL1                | ATHL1           | NM_025092.4    | Hs00228253_m1 |
|                       | CDC42               | CDC42   | NM_001791                     | Hs00918044_g1 |                           | ST8SIA1              | ST8SIA1         | NM_003034.3    | Hs00268157_m1 |
|                       | RHOA                | RHOA    | NM_001664                     | Hs00357608_m1 |                           | PRUNE2/KIAA0367      | PRUNE2/KIAA0367 | NM_015225.2    | Hs00322421_m1 |
|                       | RAC1                | RAC-1   | NM_018890                     | Hs01588892_g1 |                           | GLT25D2              | GLT25D2         | NM_015101.2    | Hs00362851_m1 |
|                       | INTERNEXIN-A        | INA     | NM_032727.3                   | Hs00190771    |                           | GAA                  | GAA             | NM_000152.3    | Hs00164635_m1 |
|                       | IDH1                | IDH1    | NM_005896.2                   | Hs01855675_s1 |                           | CD133                | CD133           | NM_001145847.1 | Hs01009250_m1 |
|                       | IDH2                | IDH2    | NM_002168.2                   | Hs00158033_m1 |                           | 38261                | 38261           | NM_001173531.1 | Hs04260367_gH |
|                       | GFAP                | GFAP    | NM_001131019.2                | Hs00909233_m1 | <b>Stem cell markers</b>  | SOX-2                | SOX-2           | NM_003106.3    | Hs01053049_s1 |
|                       | NESTINE             | NESTINE | NM_006617.1                   | Hs04187831_g1 |                           | CXR4                 | CXCR4           | NM_001008540.1 | Hs00607978_s1 |
|                       | OLIG2               | OLIG2   | NM_005806.3                   | Hs00300164_s1 |                           | SSEA1                | SSEA1           | NM_002033.3    | Hs01106466_s1 |
|                       | NEUROFILAMENT       | NEFL    | NM_006158                     | Hs00196245_m1 |                           | NANOG                | NANOG           | NM_024865.2    | Hs04260366_g1 |
|                       | SYNAPTOPHYSIN       | SYP     | NM_003179.2                   | Hs00300531_m1 |                           |                      |                 |                |               |
| <b>Glioma markers</b> | CD34                | CD34    | NM_001025109.1<br>NM_001773.2 | Hs00990732_m1 | <b>Housekeeping genes</b> | HPRT                 | HPRT            | NM_000194.2    | Hs02800695_m1 |
|                       | P53                 | P53     | NM_000546.5                   | Hs01034249_m1 |                           | 18S                  | 18S             | NR_003286.2    | Hs03928985_g1 |
|                       | NOTCH2              | NOTCH2  | NM_001200001.1<br>NM_024408.3 | Hs01050702_m1 |                           | BETA 2-MICROGLOBULIN | B2M             | NM_004048.2    | Hs00984230_m1 |
|                       | BDNF                | BDNF    | NM_001143809.1                | Hs03805848_m1 |                           | GAPDH                | GAPDH           | NM_001256799.1 | Hs02758991_g1 |
|                       | NERVE GROWTH FACTOR | NGF     | NM_002506.2                   | Hs01113193_m1 |                           |                      |                 |                |               |
|                       | NT3                 | NT3     | NM_001102654.1                | Hs00267375_s1 |                           |                      |                 |                |               |
|                       | NTF4                | NT4     | NM_006179.4                   | Hs01921834_s1 |                           |                      |                 |                |               |

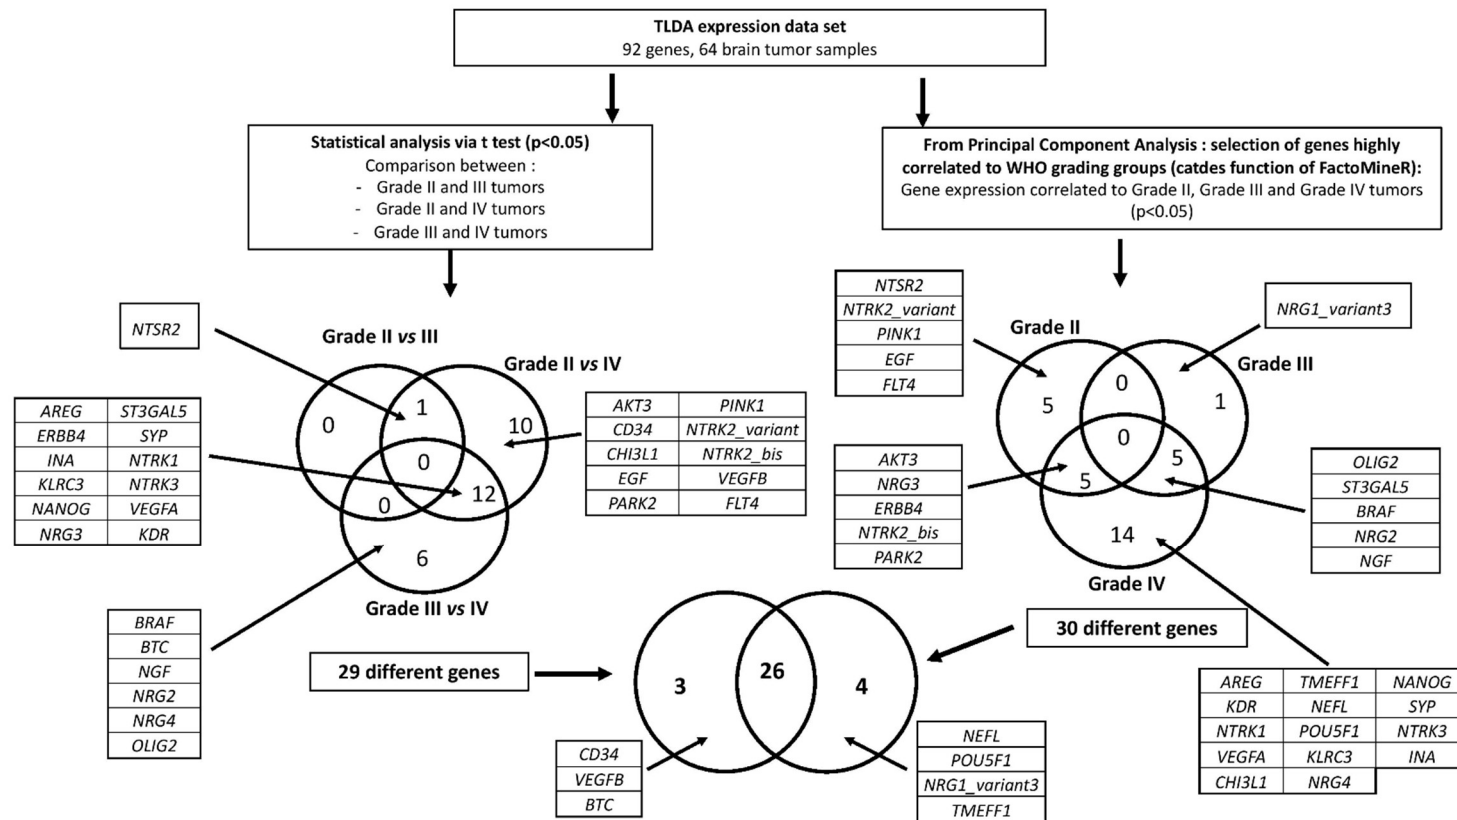

**Figure 1.** Venn diagram of gene selection in the studied cohort. Intersections between sets indicate the numbers of shared genes, whereas numbers of specific genes are shown in set-specific areas. A total of 92 genes were analyzed from 64 tumor samples, and 26 genes were selected from the cross-section of two statistical methods (*t*-test and principal component analysis).

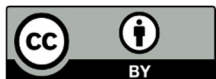

Supplement: cancers-11-00544-s001.pdf [file cancers-11-00544-s001.pdf]
